# Supplementary material
Source: publisher figshare collection journal article supplement (https://tandf.figshare.com/articles/dataset/_/4289705)
Supplement: Supplementary file 1 [file 1]

**Supplemental Figure 3.**

| For each question below, circle the number to the right that best fits your <i>level of comfort</i> with: | Comfort level                                         |   |   |   |   | For each question below, circle the number to the right that best fits your <i>level of ability</i> to: | Skill level                                   |   |   |   |   |
|-----------------------------------------------------------------------------------------------------------|-------------------------------------------------------|---|---|---|---|---------------------------------------------------------------------------------------------------------|-----------------------------------------------|---|---|---|---|
|                                                                                                           | 1 = Not at all comfortable. 5 = Extremely comfortable |   |   |   |   |                                                                                                         | 1 = Not at all skilled. 5 = Extremely skilled |   |   |   |   |
| Discussing a new diagnosis                                                                                | 1                                                     | 2 | 3 | 4 | 5 | Create an environment conducive to effective communication                                              | 1                                             | 2 | 3 | 4 | 5 |
| Warning the patient bad news is coming                                                                    | 1                                                     | 2 | 3 | 4 | 5 | Define the goals of a meeting                                                                           | 1                                             | 2 | 3 | 4 | 5 |
| Discussing recurrence                                                                                     | 1                                                     | 2 | 3 | 4 | 5 | Organize the information that needs to be relayed                                                       | 1                                             | 2 | 3 | 4 | 5 |
| Discussing a poor prognosis                                                                               | 1                                                     | 2 | 3 | 4 | 5 | Determine the level of knowledge of the patient                                                         | 1                                             | 2 | 3 | 4 | 5 |
| Avoiding premature or inappropriate reassurance                                                           | 1                                                     | 2 | 3 | 4 | 5 | Assess the patient's ability to discuss bad news                                                        | 1                                             | 2 | 3 | 4 | 5 |
| Explaining the transition to palliative care                                                              | 1                                                     | 2 | 3 | 4 | 5 | Assess how much the patient wants to know                                                               | 1                                             | 2 | 3 | 4 | 5 |
| Discussing hospice care                                                                                   | 1                                                     | 2 | 3 | 4 | 5 | Provide information in a way that it will be understood                                                 | 1                                             | 2 | 3 | 4 | 5 |
| Telling a patient they are going to die                                                                   | 1                                                     | 2 | 3 | 4 | 5 | Avoid medical jargon                                                                                    | 1                                             | 2 | 3 | 4 | 5 |
| Discussing DNR                                                                                            | 1                                                     | 2 | 3 | 4 | 5 | Communicate a diagnosis                                                                                 | 1                                             | 2 | 3 | 4 | 5 |
| Checking the patient's understanding                                                                      | 1                                                     | 2 | 3 | 4 | 5 | Check the patient's readiness to discuss management options                                             | 1                                             | 2 | 3 | 4 | 5 |
| Encouraging the patient to ask questions                                                                  | 1                                                     | 2 | 3 | 4 | 5 | Use open ended questions to assess patient understanding                                                | 1                                             | 2 | 3 | 4 | 5 |
| Responding to anger                                                                                       | 1                                                     | 2 | 3 | 4 | 5 | Summarize what has been discussed                                                                       | 1                                             | 2 | 3 | 4 | 5 |
| Responding to sadness                                                                                     | 1                                                     | 2 | 3 | 4 | 5 | Communicate a poor prognosis                                                                            | 1                                             | 2 | 3 | 4 | 5 |
| Responding to crying                                                                                      | 1                                                     | 2 | 3 | 4 | 5 | Discuss the transition to palliative care                                                               | 1                                             | 2 | 3 | 4 | 5 |
| Dealing with denial                                                                                       | 1                                                     | 2 | 3 | 4 | 5 | Discuss DNR                                                                                             | 1                                             | 2 | 3 | 4 | 5 |
| Acknowledging a patient's emotion                                                                         | 1                                                     | 2 | 3 | 4 | 5 | Respond to anger                                                                                        | 1                                             | 2 | 3 | 4 | 5 |
| Encouraging expression of feelings                                                                        | 1                                                     | 2 | 3 | 4 | 5 | Respond to sadness                                                                                      | 1                                             | 2 | 3 | 4 | 5 |
| Asking the patient the reason for a particular emotion                                                    | 1                                                     | 2 | 3 | 4 | 5 | Respond to crying                                                                                       | 1                                             | 2 | 3 | 4 | 5 |
| Showing your own emotion to a patient                                                                     | 1                                                     | 2 | 3 | 4 | 5 | Determine the reason for an emotion                                                                     | 1                                             | 2 | 3 | 4 | 5 |
| Allowing there to be silence                                                                              | 1                                                     | 2 | 3 | 4 | 5 | Normalize patient emotions                                                                              | 1                                             | 2 | 3 | 4 | 5 |
