# Supplementary material
Source: publisher figshare collection journal article supplement (https://tandf.figshare.com/articles/dataset/_/4289705)
Supplement: Supplementary file 2 [file 1]

Supplemental Figure 1.

| Communication Skills Training Survey |                                                                                                                                                                                     |  |
|--------------------------------------|-------------------------------------------------------------------------------------------------------------------------------------------------------------------------------------|--|
| 1.                                   | Did you have any formal training in communication skills during your own pediatric fellowship training?                                                                             |  |
|                                      | Yes                                                                                                                                                                                 |  |
|                                      | No                                                                                                                                                                                  |  |
|                                      | I don't know                                                                                                                                                                        |  |
| 2.                                   | Do your trainees participate in any formal communication skills training during their fellowship?                                                                                   |  |
|                                      | Yes                                                                                                                                                                                 |  |
|                                      | No                                                                                                                                                                                  |  |
|                                      | I don't know                                                                                                                                                                        |  |
| 3.                                   | Do you have a formal mechanism to remediate fellows whose communication skills do not meet expected or desired m                                                                    |  |
|                                      | Yes                                                                                                                                                                                 |  |
|                                      | No                                                                                                                                                                                  |  |
|                                      | I don't know                                                                                                                                                                        |  |
| 4.                                   | In general, how important is it for trainees to participate in communication skills training during pediatric fellowship?                                                           |  |
|                                      | Not important                                                                                                                                                                       |  |
|                                      | Slightly important                                                                                                                                                                  |  |
|                                      | Fairly important                                                                                                                                                                    |  |
|                                      | Important                                                                                                                                                                           |  |
|                                      | Extremely important                                                                                                                                                                 |  |
| 5.                                   | What are the major barriers to implementing clinical skills training in your fellowship program? (select up to 3 barriers)                                                          |  |
|                                      | The fellows do not have enough time to participate                                                                                                                                  |  |
|                                      | The faculty does not have enough time to develop the course                                                                                                                         |  |
|                                      | The faculty does not have enough time to facilitate the training sessions                                                                                                           |  |
|                                      | Cost of implementing communication skills training                                                                                                                                  |  |
|                                      | Lack of fellow interest in communication skills training                                                                                                                            |  |
|                                      | Lack of faculty interest in communication skills training                                                                                                                           |  |
|                                      | Lack of faculty expertise in communication skills training                                                                                                                          |  |
|                                      | Other                                                                                                                                                                               |  |
|                                      | Lack of physical space to conduct the communication skills session                                                                                                                  |  |
|                                      | There are no barriers                                                                                                                                                               |  |
| 6.                                   | How likely are you to implement communication skills training in your fellowship program in the next 3 years?                                                                       |  |
|                                      | We already have communications skills training in our fellowship                                                                                                                    |  |
|                                      | Not Likely                                                                                                                                                                          |  |
|                                      | Somewhat Likely                                                                                                                                                                     |  |
|                                      | Very Likely                                                                                                                                                                         |  |
| 7.                                   | If you were to implement a communication skills training program in your institution, how likely are you set up your own program versus working with the other fellowship programs? |  |
|                                      | We already have a communication skills training program and we set up our own program                                                                                               |  |
|                                      | We already have a communication skills training program with other fellowship programs                                                                                              |  |
|                                      | Likely to set up our own program                                                                                                                                                    |  |
|                                      | Likely to set up a program with other fellowship programs                                                                                                                           |  |
| 8.                                   | What do you believe is the maximum cost your program would be willing to spend to implement clinical skills training for your fellows?                                              |  |
|                                      | \$0 per fellow each year                                                                                                                                                            |  |
|                                      | \$50 per fellow each year                                                                                                                                                           |  |
|                                      | \$100 per fellow each year                                                                                                                                                          |  |
|                                      | \$200 per fellow each year                                                                                                                                                          |  |
|                                      | \$500 per fellow each year                                                                                                                                                          |  |
|                                      | \$1000 per fellow each year                                                                                                                                                         |  |
|                                      | >\$1000 per fellow each year                                                                                                                                                        |  |
| 9.                                   | How many total fellows do you have in your training program?                                                                                                                        |  |
|                                      | 1-3                                                                                                                                                                                 |  |
|                                      | 4-6                                                                                                                                                                                 |  |
|                                      | 7-9                                                                                                                                                                                 |  |
|                                      | 10-12                                                                                                                                                                               |  |
|                                      | 13-16                                                                                                                                                                               |  |
|                                      | 17-19                                                                                                                                                                               |  |
|                                      | >19                                                                                                                                                                                 |  |
| 10.                                  | What is your specialty?                                                                                                                                                             |  |
|                                      | General Pediatrics                                                                                                                                                                  |  |
|                                      | Adolescent Medicine                                                                                                                                                                 |  |
|                                      | Allergy and Immunology                                                                                                                                                              |  |
|                                      | Behavior and Development                                                                                                                                                            |  |
|                                      | Cardiology                                                                                                                                                                          |  |
|                                      | Child Abuse                                                                                                                                                                         |  |
|                                      | Child Psychiatry                                                                                                                                                                    |  |
|                                      | Critical Care                                                                                                                                                                       |  |
|                                      | Emergency Medicine                                                                                                                                                                  |  |
|                                      | Endocrinology                                                                                                                                                                       |  |
|                                      | Gastroenterology                                                                                                                                                                    |  |
|                                      | Hematology/Oncology                                                                                                                                                                 |  |
|                                      | Infectious Disease                                                                                                                                                                  |  |
|                                      | Neonatology                                                                                                                                                                         |  |
|                                      | Nephrology                                                                                                                                                                          |  |
|                                      | Neurology                                                                                                                                                                           |  |
|                                      | Pulmonary Medicine                                                                                                                                                                  |  |
|                                      | Rheumatology                                                                                                                                                                        |  |
|                                      | Other                                                                                                                                                                               |  |
