# Supplementary material
Source: publisher figshare collection journal article supplement (https://tandf.figshare.com/articles/dataset/_/4289705)
Supplement: Supplementary file 3 [file 1]

Archive with 4 entries (4 files):
- ipho_a_1240279_sm2302.docx
- ipho_a_1240279_sm2167.pdf
- ipho_a_1240279_sm2165.pdf
- ipho_a_1240279_sm2157.pdf
