# Supplementary material
Source: publisher figshare collection journal article supplement (https://tandf.figshare.com/articles/dataset/_/4289705)
Supplement: Supplementary file 3 [file 1 › ipho_a_1240279_sm2165.pdf]

Supplemental Figure 2.

| <b><u>Strategies for communicating difficult news to patients and families</u></b>                                                                                                                                                                                                                                                                                                                                                                                                                                                                                                                                                                                                                                                                                                                                                                                                                                                                                                                                                                                                                                                                                                                                                                                                                                                                                                                                                                                                                                                                                                                                                                                                                                                                                                                                                                                                                                                                                                                                                                                                                                                                                                                                                                                                               |                                                                                                                                                                                                                                                                                                                                                                                                                                                                                                                                                                                                                                                                                                                                                                                                                                                                                                                                                                                                                                                                                                                                                                                                                                                                                                                                                                                                                                                                                                                                                                                                                                                                                                                                                                                                                                                                                                                                                                                                                                                                                                                                                                                                                                                                                                                                                                                                                                                                                                                                                                                                                                                                                                                                                                                                               |
|--------------------------------------------------------------------------------------------------------------------------------------------------------------------------------------------------------------------------------------------------------------------------------------------------------------------------------------------------------------------------------------------------------------------------------------------------------------------------------------------------------------------------------------------------------------------------------------------------------------------------------------------------------------------------------------------------------------------------------------------------------------------------------------------------------------------------------------------------------------------------------------------------------------------------------------------------------------------------------------------------------------------------------------------------------------------------------------------------------------------------------------------------------------------------------------------------------------------------------------------------------------------------------------------------------------------------------------------------------------------------------------------------------------------------------------------------------------------------------------------------------------------------------------------------------------------------------------------------------------------------------------------------------------------------------------------------------------------------------------------------------------------------------------------------------------------------------------------------------------------------------------------------------------------------------------------------------------------------------------------------------------------------------------------------------------------------------------------------------------------------------------------------------------------------------------------------------------------------------------------------------------------------------------------------|---------------------------------------------------------------------------------------------------------------------------------------------------------------------------------------------------------------------------------------------------------------------------------------------------------------------------------------------------------------------------------------------------------------------------------------------------------------------------------------------------------------------------------------------------------------------------------------------------------------------------------------------------------------------------------------------------------------------------------------------------------------------------------------------------------------------------------------------------------------------------------------------------------------------------------------------------------------------------------------------------------------------------------------------------------------------------------------------------------------------------------------------------------------------------------------------------------------------------------------------------------------------------------------------------------------------------------------------------------------------------------------------------------------------------------------------------------------------------------------------------------------------------------------------------------------------------------------------------------------------------------------------------------------------------------------------------------------------------------------------------------------------------------------------------------------------------------------------------------------------------------------------------------------------------------------------------------------------------------------------------------------------------------------------------------------------------------------------------------------------------------------------------------------------------------------------------------------------------------------------------------------------------------------------------------------------------------------------------------------------------------------------------------------------------------------------------------------------------------------------------------------------------------------------------------------------------------------------------------------------------------------------------------------------------------------------------------------------------------------------------------------------------------------------------------------|
| <p><b><u>Categories of communication skills</u></b></p> <p><b><u>Information organizations skills</u></b></p> <ul style="list-style-type: none"> <li>-Preview information</li> <li>-Give an overview of the main points you are about to cover</li> <li>-Summarize</li> </ul> <p><b><u>Checking skills</u></b></p> <ul style="list-style-type: none"> <li>-Check patient medical knowledge</li> <li>-Check patient preference for information</li> <li>-Check patient understanding</li> </ul> <p><b><u>Shared-decision making skills</u></b></p> <ul style="list-style-type: none"> <li>-Check patient preference for decision making</li> <li>-Introduce joint decision making between doctor and patient/family</li> <li>-Make partnership statements</li> <li>-Express a willingness to help</li> </ul> <p><b><u>Questioning skills</u></b></p> <ul style="list-style-type: none"> <li>-Invite and endorse patient questions</li> <li>-Ask open-ended questions</li> <li>-Clarify</li> <li>-Restate</li> <li>-Pause to review and seek permission to move on</li> </ul> <p><b><u>Empathic communication skills</u></b></p> <ul style="list-style-type: none"> <li>-Acknowledge: Make a statement that indicates recognition of a patient's emotion/experience</li> <li>-Normalize: Make a statement to reassure that an emotional response is not out of the ordinary</li> <li>-Validate: Tell the patient the emotional response is appropriate and reasonable</li> <li>-Encourage expression of feelings</li> <li>-Praise patient efforts</li> </ul> <p>Brown RF, et al. Communication Skills Training: Describing a New Conceptual Model. <i>Academic Medicine</i>. 2008;83(1):37-44. <i>Article attached.</i></p> <p><b><u>The 6 Steps of SPIKES</u></b></p> <p><b>Setting</b></p> <ul style="list-style-type: none"> <li>-Arrange for privacy</li> <li>-Involve appropriate family members</li> <li>-Make a connection with the patient (i.e. eye contact, touch the patient)</li> </ul> <p><b>Perception</b></p> <ul style="list-style-type: none"> <li>-Use open ended questions to assess the patient's understanding of the situation</li> </ul> <p><b>Invitation</b></p> <ul style="list-style-type: none"> <li>-Gauge how much detail the patient/family wants to know</li> </ul> | <p><b>Knowledge</b></p> <ul style="list-style-type: none"> <li>-Warn the patient that bad news is coming (Opening statements like, "I wish I had better news" or "I'm sorry to have to tell you this" gives the patient a chance to prepare themselves</li> <li>-Provide the diagnosis and prognosis at the level of comprehension of the patient</li> <li>-Make sure they are ready to move on to the next piece of information</li> </ul> <p><b>Emotions</b></p> <ul style="list-style-type: none"> <li>-Observe and acknowledge an emotion</li> <li>-Identify the reason for the emotion</li> <li>-Give patient time to express feelings</li> <li>-Provide an empathic response</li> </ul> <p><b>Summary</b></p> <ul style="list-style-type: none"> <li>-Check patient understanding</li> <li>-Summarize what has been discussed</li> <li>-Articulate a plan for the future</li> </ul> <p>Baile WF, et al. SPIKES – A Six-Step Protocol for Delivering Bad News: Application to the Patient with Cancer. <i>The Oncologist</i>. 2000;5:302-311. <i>Article attached.</i></p> <p><b><u>Keys to handling emotion</u></b></p> <ul style="list-style-type: none"> <li>-Be prepared to support them through a broad range of reactions</li> <li>-Allow time for the patient and family to express their immediate feelings; don't rush them</li> <li>-Listen quietly and attentively</li> <li>-Acknowledge and identify reasons for emotions               <ul style="list-style-type: none"> <li>"I imagine this is difficult news."</li> <li>"You appear angry. Can you tell me what you are feeling?"</li> <li>"Tell me more about how you are feeling about what I just said."</li> <li>"What worries you most?"</li> </ul> </li> <li>-Provide an empathic response               <ul style="list-style-type: none"> <li>"I know that this isn't what you wanted to hear."</li> <li>"I wish the news were different."</li> </ul> </li> <li>-Normalize the emotion</li> <li>-Non-verbal communication may also be helpful</li> </ul> <p>Education for Physicians on End-of-life Care (EPEC) Project (1999).</p> <p><b><u>Additional reading material</u></b></p> <p>Leinard A, et al. Factors that influence cancer patients' anxiety following a medical consultation: impact of a communication skills training programme for physicians. <i>Annals of Oncology</i>. 2006;17:1450-1458.</p> <p>Goelz T, et al. Specific Training Program Improves Oncologists' Palliative Care Communication skills in a Randomized Controlled Trial. <i>J Clin Oncol</i>. 2011;29:3402-3407.</p> <p>Levetown M and the Committee on Bioethics Pediatrics. Communicating With Children and Families: From Everyday Interactions to Skill in Conveying Distressing Information <i>Pediatrics</i>. 2008;121(5):e1441-60.</p> |
