# Supplementary material
Source: publisher figshare collection journal article supplement (https://tandf.figshare.com/articles/dataset/_/4289705)
Supplement: Supplementary file 3 [file 1 › ipho_a_1240279_sm2302.docx]

**Supplemental Figure 1. Fellowship program director survey.** A 10 question survey tool was developed to assess the state of formal communication skills training programs in pediatric fellowships

**Supplemental Figure 2. Strategy hand out**. Prior to the initial session, all trainees were provided a handout on communication strategies as well as a list of supplemental reading material

**Supplemental Figure 3. Pre- and post-training assessment**. Trainees completed a pre-training questionnaire, developed by the authors to specifically address fellow comfort level and self-assessed skill level of various components of communicating difficult news The evaluation tool utilized a Likert scale of 1-5, with 1 representing feeling not at all comfortable or skilled in a specific area of communication and 5 representing extreme comfort or skill in such an area. .

**Supplemental Figure 4. Clinical vignettes.** Each trainee was provided a copy of the clinical vignette immediately prior to the SP interaction, which included a detailed clinical history as well as communication goals the trainee would strive to meet by the conclusion of the encounter. SPs were provided a vignette prior to the session that included a detailed character and disease history as well as concerns that the SP would express to the trainee.
